# Supplementary material
Source: publisher site journal article supplement (https://kjim.org/upload/media/kjim-2023-303-Supplementary-Table-1.pdf)
Supplement: Supplementary file 1 [file kjim-2023-303-Supplementary-Table-1.pdf]

**Supplementary Table 1. Baseline characteristics of metformin users and non-users before propensity score matching in men**

| Variable                   | Men                          |                                 | p value |
|----------------------------|------------------------------|---------------------------------|---------|
|                            | Metformin users (n = 17,745) | Metformin non-users (n = 3,664) |         |
| Age group (yr)             |                              |                                 | < 0.01  |
| 18–24                      | 25 (0.1)                     | 7 (0.2)                         |         |
| 25–34                      | 195 (1.1)                    | 31 (0.9)                        |         |
| 35–44                      | 1,300 (7.3)                  | 214 (5.8)                       |         |
| 45–54                      | 4,184 (23.6)                 | 663 (18.1)                      |         |
| 55–64                      | 5,047 (28.4)                 | 858 (23.4)                      |         |
| 65–74                      | 3,960 (22.3)                 | 875 (23.9)                      |         |
| > 75                       | 3,034 (17.1)                 | 1,016 (27.7)                    |         |
| Age (yr)                   | 60 (52–71)                   | 65 (55–76)                      | < 0.01  |
| Region, metropolitan       | 7,716 (43.5)                 | 1,640 (44.8)                    | 0.156   |
| Nationality, Korean        | 17,606 (99.2)                | 3,641 (99.4)                    | 0.322   |
| Household income           |                              |                                 | < 0.01  |
| 0 (lowest)                 | 1,602 (9.0)                  | 404 (11.0)                      |         |
| 1                          | 3,013 (17.0)                 | 531 (14.5)                      |         |
| 2                          | 2,830 (16.0)                 | 516 (14.1)                      |         |
| 3                          | 2,956 (16.7)                 | 584 (15.9)                      |         |
| 4                          | 3,375 (19.0)                 | 687 (18.8)                      |         |
| 5 (highest)                | 3,969 (22.4)                 | 942 (25.7)                      |         |
| Disability                 |                              |                                 | < 0.01  |
| No                         | 14,907 (84.0)                | 2,966 (81.0)                    |         |
| Physical disability        | 2,725 (15.4)                 | 620 (16.9)                      |         |
| Internal disability        | 113 (0.6)                    | 78 (2.1)                        |         |
| Lesion site of TB          |                              |                                 | < 0.01  |
| Pulmonary                  | 16,289 (91.8)                | 3,252 (88.8)                    |         |
| Extra-pulmonary            | 1456 (8.2)                   | 412 (11.2)                      |         |
| TB history                 |                              |                                 | 0.02    |
| New case                   | 15,168 (85.5)                | 3,077 (84.0)                    |         |
| Previously treated TB      | 2,577 (14.5)                 | 587 (16.0)                      |         |
| PPM hospital               | 12,360 (69.7)                | 2,702 (73.7)                    | < 0.01  |
| AFB smear positivity       | 7,470 (42.1)                 | 1,447 (39.5)                    | 0.007   |
| Culture positivity         | 9,705 (54.7)                 | 1,881 (51.3)                    | < 0.01  |
| Charlson Comorbidity Index |                              |                                 | < 0.01  |
| 0                          | 6,956 (39.2)                 | 1,147 (31.3)                    |         |
| 1                          | 7,514 (42.3)                 | 1,492 (40.7)                    |         |
| 2                          | 1,068 (6.0)                  | 292 (8.0)                       |         |
| ≥ 3                        | 2,207 (12.4)                 | 733 (20.0)                      |         |
| Comorbidity                |                              |                                 |         |
| Transplantation            | 36 (0.2)                     | 51 (1.4)                        | < 0.01  |
| HIV                        | 13 (0.1)                     | 4 (0.1)                         | 0.482   |
| Cancer                     | 594 (3.4)                    | 201 (5.5)                       | < 0.01  |

**Supplementary Table 1. Continued**

| Variable                          | Men                          |                                 | p value |
|-----------------------------------|------------------------------|---------------------------------|---------|
|                                   | Metformin users (n = 17,745) | Metformin non-users (n = 3,664) |         |
| Notification year                 |                              |                                 | 0.028   |
| 2011                              | 2,420 (13.6)                 | 575 (15.7)                      |         |
| 2012                              | 2,668 (15.0)                 | 543 (14.8)                      |         |
| 2013                              | 2,494 (14.1)                 | 525 (14.3)                      |         |
| 2014                              | 2,490 (14.0)                 | 518 (14.1)                      |         |
| 2015                              | 2,533 (14.3)                 | 494 (13.5)                      |         |
| 2016                              | 2,620 (14.8)                 | 495 (13.5)                      |         |
| 2017                              | 2,520 (14.2)                 | 514 (14.0)                      |         |
| Anti-diabetic treatment           |                              |                                 |         |
| Sulfonylurea                      | 10,417 (58.7)                | 2,265 (61.8)                    | < 0.01  |
| Insulin                           | 795 (4.5)                    | 487 (13.3)                      | < 0.01  |
| Other DM medication <sup>a)</sup> | 11,424 (64.4)                | 2,343 (64.0)                    | 0.619   |
| Follow-up duration (d)            | 238 (185–300)                | 234 (183–297)                   | < 0.01  |
| Treatment outcome                 |                              |                                 | < 0.01  |
| Treatment success/failure         | 16,437 (92.6)                | 3,175 (86.7)                    |         |
| Death due to all causes           | 1,308 (7.4)                  | 489 (13.3)                      |         |
| Cause of death                    |                              |                                 | 0.08    |
| TB-related deaths                 | 227 (1.3)                    | 68 (1.9)                        |         |
| Non-TB-related deaths             | 1,081 (6.1)                  | 421 (11.5)                      |         |

Values are presented as number (%) or median (interquartile range).

AFB, acid-fast bacilli; DM, diabetes mellitus; HIV, human immunodeficiency virus; PPM, public-private mix; TB, tuberculosis.

<sup>a)</sup>Other DM medications include dipeptidyl peptidase-4 inhibitors, glinide, thiazolidinedione, glucagon-like peptide-1, alpha-glucosidase inhibitors, and sodium-glucose cotransporter-2 inhibitors.
